# Supplementary material for: Prevalence of Glomerulopathies in Canine Mammary Carcinoma
Source: PubMed Central journal article supplement (PMC5072677; doi:10.1371/journal.pone.0164479), 2016-10-20
Supplement: pone.0164479.s003.pdf [file pone.0164479.s003.pdf]

**S1 Table 1. Number of dogs that had positive IF labeling with antibodies against canine IgG, IgM, IgA and C3.**

|                        | Control (n =11) |                               | Neoplasia (n =29) |                               | <i>p</i> |
|------------------------|-----------------|-------------------------------|-------------------|-------------------------------|----------|
|                        | positive IF     | Intensity median<br>(min-max) | positive IF       | Intensity median<br>(min-max) |          |
| <b>IgM<sup>a</sup></b> | 3               | 0 (0-0.5)                     | 28                | 2 (0-3)                       | <0.0001  |
| <b>IgG<sup>b</sup></b> | 0               | 0 (0-0)                       | 5                 | 0 (0-2)                       | 0.125    |
| <b>IgA<sup>c</sup></b> | 0               | 0 (0-0)                       | 7                 | 0 (0-2)                       | 0.015    |
| <b>C3<sup>d</sup></b>  | 0               | 0 (0-0)                       | 5                 | 0 (0-2)                       | 0.062    |

<sup>a</sup>IgM: immunoglobulin M; IgG<sup>b</sup>: immunoglobulin G; IgA<sup>c</sup>: immunoglobulin A; C3<sup>d</sup>: complement C3

Immunofluorescence score data was not normally distributed and statistical comparisons were performed using Kruskal-Wallis analysis, followed by the Dunns' post-hoc test. Significance was set at  $p < 0.05$ . Calculations were performed using JMP<sup>®</sup> software.
